# Supplementary material for: Analysis of histology and long noncoding RNAs involved in the rabbit hair follicle density using RNA sequencing
Source: Research Square preprint supplement (doi:10.21203/rs.3.rs-43570/v3), 2021-01-22
Supplement: Supplementary file 2 [file 562e30fc63bd3f28f12afb39.xlsx]

## Sheet: DE mRNAs
transcript_id	gene_id	gene_name	feature_id	Low_FPKM	High_FPKM	log2(foldchange)	pvalue
ENSOCUT00000000968	ENSOCUG00000000968	DES	transcript	17.2553	5.96173	1.53323	0.042428
ENSOCUT00000002610	ENSOCUG00000002610	UBE2L3	transcript	10.6323	27.0008	-1.34455	0.0307714
ENSOCUT00000004730	ENSOCUG00000004732	TCHHL1	transcript	136.474	365.265	-1.42032	0.0113451
ENSOCUT00000004947	ENSOCUG00000004947	SLC45A2	transcript	1.08267	2.94347	-1.44293	0.0379408
ENSOCUT00000005205	ENSOCUG00000005208	-	transcript	8.50647	36.1687	-2.08811	0.0122963
ENSOCUT00000005594	ENSOCUG00000005596	GREM1	transcript	12.8881	5.28114	1.28711	0.00354272
ENSOCUT00000005933	ENSOCUG00000005935	CCL11	transcript	2.64654	1.00567	1.39594	0.00330487
ENSOCUT00000006931	ENSOCUG00000006933	-	transcript	18.1318	42.3462	-1.22372	0.00117176
ENSOCUT00000007298	ENSOCUG00000007302	CILP	transcript	18.1641	8.53114	1.09028	0.0442623
ENSOCUT00000008559	ENSOCUG00000008553	PRUNE2	transcript	8.98659	3.92083	1.19662	0.0163362
ENSOCUT00000010339	ENSOCUG00000010340	ALOX15B	transcript	3.45644	7.43229	-1.10452	0.0231511
ENSOCUT00000010762	ENSOCUG00000010755	PLCB4	transcript	4.02067	1.63107	1.30162	0.0132447
ENSOCUT00000011300	ENSOCUG00000011302	-	transcript	13.6041	5.11462	1.41134	0.0423055
ENSOCUT00000013408	ENSOCUG00000013412	-	transcript	34.9299	16.3459	1.09554	0.00819279
ENSOCUT00000013742	ENSOCUG00000027077	-	transcript	36.9458	110.046	-1.57462	0.0379887
ENSOCUT00000013813	ENSOCUG00000021824	-	transcript	42.6855	102.901	-1.26944	0.0109058
ENSOCUT00000013855	ENSOCUG00000013865	PLN	transcript	5.59566	1.97918	1.49941	0.0270139
ENSOCUT00000014124	ENSOCUG00000014125	PGM5	transcript	8.29061	3.41235	1.28071	0.000779698
ENSOCUT00000016583	ENSOCUG00000016589	KRTAP15-1	transcript	162.827	366.565	-1.17073	0.0402389
ENSOCUT00000017527	ENSOCUG00000017531	-	transcript	1.74342	4.25723	-1.28799	0.0188107
ENSOCUT00000017732	ENSOCUG00000017729	SCN7A	transcript	3.97059	1.69992	1.22389	0.0212997
ENSOCUT00000021371	ENSOCUG00000026444	-	transcript	16.948	50.1572	-1.56534	0.00790546
ENSOCUT00000022648	ENSOCUG00000022976	-	transcript	2.89173	1.12353	1.36389	0.00311837
ENSOCUT00000022934	ENSOCUG00000015937	RBM41	transcript	0.334427	2.99295	-3.16181	0.00544806
ENSOCUT00000023123	ENSOCUG00000021965	TMEM150C	transcript	4.42865	1.96209	1.17448	0.00447413
ENSOCUT00000024404	ENSOCUG00000025513	IGFBP5	transcript	167.236	80.7057	1.05115	0.0315877
ENSOCUT00000024409	ENSOCUG00000008142	TCF7L2	transcript	1.08851	2.44339	-1.16653	0.0124957
ENSOCUT00000024704	ENSOCUG00000013450	MYH11	transcript	40.5934	18.7274	1.11609	0.0380822
ENSOCUT00000026246	ENSOCUG00000024410	-	transcript	46.5203	21.1252	1.13889	0.0312693
ENSOCUT00000027619	ENSOCUG00000016448	CCL21	transcript	21.5362	8.66001	1.31433	0.00118491
ENSOCUT00000028672	ENSOCUG00000028230	-	transcript	8.40562	3.91578	1.10206	0.0196212
ENSOCUT00000029380	ENSOCUG00000021817	-	transcript	9.79551	3.59772	1.44504	0.016705
ENSOCUT00000029778	ENSOCUG00000027154	CKM	transcript	2.70141	1.17764	1.19781	0.0403203
ENSOCUT00000031633	ENSOCUG00000024632	FOXI2	transcript	0.604268	2.87469	-2.25015	0.00159745
ENSOCUT00000032180	ENSOCUG00000021503	-	transcript	20.6765	51.1143	-1.30573	0.0341855
ENSOCUT00000033874	ENSOCUG00000009962	OTOP2	transcript	2.4412	5.45868	-1.16096	0.0427456
ENSOCUT00000033981	ENSOCUG00000004961	CELF2	transcript	4.15119	1.43922	1.52824	0.0282248
ENSOCUT00000034145	ENSOCUG00000010331	FAM92A	transcript	1.22774	3.90954	-1.671	0.00127174

## Sheet: DE lncRNAs
transcript_id	gene_id	gene_name	feature_id	Low_FPKM	High_FPKM	log2(foldchange)	pvalue
LNC_000797	XLOC_013458	.	transcript	3.26242	0.677029	2.26865	0.0190562
LNC_001081	XLOC_019052	.	transcript	2.2488	0.595516	1.91694	0.0129172
LNC_001173	XLOC_020734	.	transcript	0.889346	4.56949	-2.36122	0.0393672
LNC_001607	XLOC_027696	.	transcript	2.31208	0.007683	8.2333	0.00786001
LNC_002171	XLOC_038659	.	transcript	13.042	6.04476	1.10941	0.00652619
LNC_002609	XLOC_046590	.	transcript	0.374607	2.46346	-2.71723	0.00595571
LNC_004138	XLOC_068357	.	transcript	22.6407	2.7192	3.05766	0.00100386
LNC_004162	XLOC_068459	.	transcript	5.93039	2.63634	1.16959	0.0274913
LNC_004168	XLOC_068505	.	transcript	8.0529	21.773	-1.43496	0.0129455
LNC_004421	XLOC_072264	.	transcript	1.70288	0.565706	1.58986	0.0319558
LNC_004680	XLOC_075732	.	transcript	0.856837	3.11678	-1.86297	0.0276918
LNC_005567	XLOC_092727	.	transcript	306.54	767.224	-1.32357	0.0310845
LNC_005922	XLOC_098850	.	transcript	0.312397	1.98733	-2.66938	0.0447179
LNC_007649	XLOC_123770	.	transcript	1.85922	4.27193	-1.20019	0.0099541
LNC_007739	XLOC_124734	.	transcript	3.10995	15.209	-2.28996	0.0390631
LNC_008678	XLOC_135269	.	transcript	2.13396	0.226131	3.2383	0.00506823
LNC_008972	XLOC_137806	.	transcript	0.680357	2.50275	-1.87915	0.0150405
LNC_008974	XLOC_137806	.	transcript	1.77411	4.30457	-1.27877	0.0284461
LNC_009164	XLOC_139806	.	transcript	27.0103	6.48594	2.05812	0.0441929
LNC_011236	XLOC_174648	.	transcript	2.5775	0.715216	1.84952	0.0346634
LNC_012042	XLOC_187861	.	transcript	0.24341	2.35788	-3.27603	0.000186301
LNC_012840	XLOC_197800	.	transcript	2.53445	0.720993	1.81361	0.0268212
LNC_013595	XLOC_210705	.	transcript	11.1984	23.3828	-1.06216	0.016342
LNC_014183	XLOC_220714	.	transcript	0.0008885	3.2791	-11.8496	0.0207838
LNC_014195	XLOC_220714	.	transcript	7.92594	16.3978	-1.04885	0.0405876
LNC_015228	XLOC_238129	.	transcript	2.64973	0.899204	1.55913	0.0174033
LNC_015366	XLOC_240862	.	transcript	1.68831	3.51014	-1.05595	0.00810549
LNC_015439	XLOC_242058	.	transcript	1.86104	0.593022	1.64995	0.0385184
LNC_015811	XLOC_248944	.	transcript	0.734055	2.64093	-1.84709	0.038846
LNC_015871	XLOC_249751	.	transcript	1.96809	13.2906	-2.75554	0.0174793
LNC_015872	XLOC_249751	.	transcript	0.589867	19.5654	-5.05177	0.00320948
LNC_015983	XLOC_250762	.	transcript	0.483498	2.23171	-2.20657	0.0214774
LNC_016050	XLOC_251161	.	transcript	0.386586	1.8389	-2.24998	0.0439212
LNC_016077	XLOC_251335	.	transcript	0.507456	2.34935	-2.21091	0.0193013
LNC_016153	XLOC_251779	.	transcript	0.0229978	2.04234	-6.47259	0.0288912
LNC_016156	XLOC_251781	.	transcript	0.0130755	3.30147	-7.9801	0.0463228
LNC_016632	XLOC_259355	.	transcript	0.222662	2.00769	-3.17261	0.0195669
LNC_017619	XLOC_274586	.	transcript	3.31884	7.5248	-1.18097	0.046179
LNC_017640	XLOC_274727	.	transcript	0.559777	3.17564	-2.50412	0.0245238
LNC_017748	XLOC_276262	.	transcript	0.327171	3.37343	-3.3661	0.0103042
LNC_017889	XLOC_278078	.	transcript	1.52503	3.8907	-1.35119	0.0310492
LNC_018148	XLOC_281017	.	transcript	4.49047	1.60951	1.48024	0.00783193
LNC_018696	XLOC_286703	.	transcript	0.96013	2.18443	-1.18596	0.021097
LNC_019019	XLOC_290032	.	transcript	2.6897	7.91576	-1.55728	0.0381941
LNC_019538	XLOC_295091	.	transcript	0.675218	2.7153	-2.00768	0.0470674
LNC_020364	XLOC_304957	.	transcript	0.76526	3.49663	-2.19194	0.0166667
LNC_020367	XLOC_304978	.	transcript	5.52928	18.7031	-1.75811	0.0025906
LNC_020374	XLOC_304981	.	transcript	0.329313	2.96107	-3.16859	0.00500004
LNC_020418	XLOC_305417	.	transcript	2.61719	0.611225	2.09825	0.0103523
LNC_021862	XLOC_325734	.	transcript	2.55536	9.3315	-1.86858	0.0286606
