# Supplementary material for: Analysis of histology and long noncoding RNAs involved in the rabbit hair follicle density using RNA sequencing
Source: Research Square preprint supplement (doi:10.21203/rs.3.rs-43570/v3), 2021-01-22

**Figure S1**

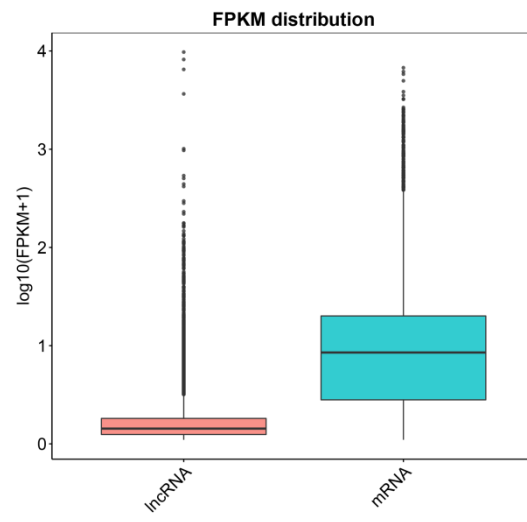

Supplement: Supplementary file [file 4156abe9f1ab70fb71eab020.pdf]
